# Supplementary material for: An Analysis of the Pattern of Adaptive Emotion Regulation Associated with Low Paranoid Ideation in Healthy and Clinical Samples
Source: Springer Nature journal article supplement (doi:10.1007/s10608-020-10173-6), 2020-11-11
Supplement: MOESM1 [file 18579028]

| **Table A1**  *Study 1: Multiple Regression Analysis for Emotion Regulation Strategies as Independent Variables and Paranoid Ideation as Dependent Variable Controlling for Gender* | | | | |
| --- | --- | --- | --- | --- |
| Variable | *B* | *SE* | 95% CI *a* | *p* |
| Modification | -1.01 | 1.35 | [-3.36, 1.99] | .466 |
| Acceptance/Tolerance | 2.41 | 1.01 | [0.18, 4.14] | .018 |
| Self-Support | -0.13 | 0.14 | [-0.44, 0.11] | .353 |
| Comprehension | -0.04 | 0.21 | [-4.26, 0.38] | .868 |
| Modification × Self-Support | -0.08 | 0.23 | [-0.46, 0.43] | .714 |
| Modification × Comprehension | 0.21 | 0.40 | [-0.69, 0.89] | .615 |
| Acceptance/Tolerance × Self-Support | 0.49 | 0.20 | [0.08, 0.83] | .013 |
| Acceptance/Tolerance × Comprehension | -0.73 | 0.31 | [-1.25, -0.06] | .014 |
| Gender | -.275 | .178 | [-0.65, -0.06] | .140 |
| *Note.* CI = confidence interval.  *a* Confidence interval per bootstrap with 1.000 samples. | | | | |
