# Supplementary material for: An Analysis of the Pattern of Adaptive Emotion Regulation Associated with Low Paranoid Ideation in Healthy and Clinical Samples
Source: Springer Nature journal article supplement (doi:10.1007/s10608-020-10173-6), 2020-11-11
Supplement: MOESM2 [file 18579028]

| **Table A2**  *Study 1: Multiple Regression Analysis for Emotion Regulation Strategies as Independent Variables and Paranoid Ideation as Dependent Variable with Complete Cases* | | | | |
| --- | --- | --- | --- | --- |
| Variable | *B* | *SE* | 95% CI *a* | *p* |
| Modification | -0.32 | 0.16 | [-0.66, -0.03] | .042 |
| Acceptance/Tolerance | 0.08 | 0.16 | [-0.26, 0.41] | .640 |
| Self-Support | -0.19 | 0.14 | [-0.49, 0.07] | .189 |
| Comprehension | -0.05 | 0.12 | [-0.26, 0.20] | .646 |
| Modification × Self-Support | -0.07 | 0.23 | [-0.48, 0.42] | .746 |
| Modification × Comprehension | 0.13 | 0.25 | [-0.43, 0.57] | .604 |
| Acceptance/Tolerance × Self-Support | 0.50 | 0.20 | [0.04, 0.88] | .016 |
| Acceptance/Tolerance × Comprehension | -0.47 | 0.19 | [-0.79, -0.05] | .013 |
| *Note.* CI = confidence interval.  *a* Confidence interval per bootstrap with 1.000 samples. | | | | |
